# Supplementary material for: Root Colonization by Fungal Entomopathogen Systemically Primes Belowground Plant Defense against Cabbage Root Fly
Source: MDPI journal article supplement (doi:10.3390/jof8090969), 2022-09-16
Supplement: s1 [file s1]

## Supplementary material

### Article title

**Root colonization by fungal entomopathogen systemically primes belowground plant defense against cabbage root fly**

### Authors

**Catalina Posada-Vergara <sup>1</sup>, Katharina Lohaus <sup>1</sup>, Mohammad Alhussein <sup>2</sup>, Stefan Vidal <sup>1</sup>, and Michael Rostás <sup>1\*</sup>.**

<sup>1</sup> Agricultural Entomology, Department of Crop Sciences, University of Göttingen, Grisebachstr. 6, 37077 Göttingen, Germany; e-mail@e-mail.com

<sup>2</sup> Molecular Phytopathology and Mycotoxin Research, University of Göttingen, 37077 Goettingen, Germany

\* Correspondence: [michael.rostas@uni-goettingen.de](mailto:michael.rostas@uni-goettingen.de)

**Table S1.** List of the fungal strains used in the study (see (Hettlage, 2018)).

| Strain  | Crop regime                                                                             | Location                  |
|---------|-----------------------------------------------------------------------------------------|---------------------------|
| GC1I    | Semi-natural permanent grassland for at least 7 years. Grassland harvested twice a year | 51°34'10.7"N 10°03'54.1"E |
| Gd12    |                                                                                         |                           |
| Cb15III | Winter wheat, barley or oilseed rape crop rotation, conventional farming                | 51°33'58.3"N 10°04'10.1"E |
| Cb17b   |                                                                                         |                           |
| CC5     |                                                                                         |                           |

**Table S2.** Primers used for qPCR amplification of genes of *Brassica napus* root tissues

| ID              | Gen/accession | Pathway                              | Gene description                                         | Sequence 5' --> 3'         | Reference                              |
|-----------------|---------------|--------------------------------------|----------------------------------------------------------|----------------------------|----------------------------------------|
| <b>ABA2</b>     | LOC106300040  | Absciscic acid biosynthesis          | Xanthoxin dehydrogenase                                  | GCATCGCTCGTCTGTTCCAC       | Karssemeijer et al., 2021              |
|                 | XM_013736089  |                                      |                                                          | CGGCGAAGTCAACAGCGTTA       |                                        |
| <b>ERF2</b>     | At5g47220     | Ethylene (ET) signaling              | Ethylene Response Factor 2                               | ATGTACGGACAGAGCGAGGT       | Yang et al., 2010                      |
|                 |               |                                      |                                                          | AAGCTTCGAAACCAACAAGTAACTG  |                                        |
| <b>ACO</b>      | EV102889      | ET biosynthesis                      | ACC oxidase                                              | TCCGTCTGGGCTATCACTCT       | Maag 2014                              |
|                 |               |                                      |                                                          | GTGAGTGGGTCGATGTTCTT       |                                        |
| <b>PR1</b>      | XM_013877950  | Salicylic acid (SA) signaling        | Pathogenesis-related protein 1                           | AAAGCTACGCCGACCGACTACGAG   | Alkooranee 2017                        |
|                 |               |                                      |                                                          | CCAGAAAAGTCGGCGCTACTCCA    |                                        |
| <b>PAL</b>      | LOC106342153  | SA synthesis-Phenylpropanoid pathway | phenylalanine ammonia-lyase 1                            | TCGCTATGGCTTCTTACTGCTCTG   | Karssemeijer et al., 2021              |
|                 | XM_013781008  |                                      |                                                          | GAGGTCTTACGAGATGAGATGAGTCC |                                        |
| <b>AOS</b>      | LOC106327419  | Jasmonic acid (JA) synthesis         | Allene oxide synthase                                    | ACCGCTTGCGACTAGGGATC       | Karssemeijer et al., 2021              |
|                 | XM_013765565  |                                      |                                                          | CAAAGTCCTTACCGGCGCAC       |                                        |
| <b>MYC2</b>     | EV120351      | JA signaling                         | Basic helix-loop-helix (bHLH) DNA-binding family protein | GCAAAGCCCAGACAGAGAAC       | Maag et al., 2014                      |
|                 |               |                                      |                                                          | AGCTCACGCAACACCTTCTT       |                                        |
| <b>TPI</b>      | EV144353      | JA signaling                         | Trypsin inhibitor B-like                                 | GTGGTATCACCATGAACCTTG      | Maag et al., 2014                      |
|                 |               |                                      |                                                          | GTTGACCACCTTAACCGGAA       |                                        |
| <b>PDF1.2</b>   | EV163328      | JA signaling                         | Defensin-like protein 16                                 | TCCATCACCTTCTCTTTGC        | Maag et al., 2014                      |
|                 |               |                                      |                                                          | TTTTGGCACGCATAGTCGTA       |                                        |
| <b>ACTIN</b>    | AF111812      | Housekeeping gene                    | Housekeeping gene                                        | ATCGTCTCAGTGGTGGTTC        | Maag et al., 2014                      |
|                 |               |                                      |                                                          | TTGATCTTCATGCTGCTTGG       |                                        |
| <b>GTR1A2</b>   | Bra018096     | Glucosinolate (GSL) transport        | Glucosinolate Transporter 1 A2                           | ATCACCTTCGGGGAACTGG        | (Sontowski et al., 2019)               |
|                 |               |                                      |                                                          | TCGCTTGCTTCTGCTTGGTC       |                                        |
| <b>CYP79B2</b>  | At4G39950     | Indole GSLs biosynthesis             | CYTOCHROME P450, FAMILY 79, SUBFAMILY B, POLYPEPTIDE 2   | AAGAGGTTGTGCTGCTCCG        | Tytgat et al., 2013<br>Also in Marthur |
|                 |               |                                      |                                                          | TCCAAGTGAAACCTGAAGAAGTC    |                                        |
| <b>CYP83A1</b>  | At4G13770     | Aliphatic GSL biosynthesis           | CYTOCHROME P450, FAMILY 83, SUBFAMILY A, POLYPEPTIDE 1   | CTCCTTATCCCTCGTGCTTG       | Mathur et al., 2013                    |
|                 |               |                                      |                                                          | TGTCGTAACCAGCGATCTTG       |                                        |
| <b>BABG</b>     | LOC106429220  | Myrosinase biosynthesis              | Beta-glucosidase 27-like                                 | CCGAGCGAGCTATGGAGTTT       | This study                             |
|                 | XM_022718558  |                                      |                                                          | CGGCTTGTCTGGATCCACTT       |                                        |
| <b>BnMyr4</b>   | LOC106430598  | Myrosinase biosynthesis              | PREDICTED myrosinase 4-like                              | TCAACTGCGACAATCCCCTT       | This study                             |
|                 | XM_013871387  |                                      |                                                          | ATCACAAGCAAGGTCTCCGG       |                                        |
| <b>Myr2.Bn1</b> | LOC106382545  | Myrosinase biosynthesis              | B.napus myrosinase, thioglucoside glucohydrolase         | TTGAAGGAGGGAGAGGTCGT       | This study                             |
|                 | NM_001316199  |                                      |                                                          | AGCATTGAGTTGCCCATCA        |                                        |
| <b>DTCMT.a</b>  | LOC106392535  | Phytoalexin brassinin biosynthesis   | Dithiocarbamate S-Methyltransferase                      | TGTTCCACTGGACCTAACACG      | This study                             |
|                 | XM_013833342  |                                      |                                                          | GGCCAAAGAAAGATCCGGGA       |                                        |

**Table S3.** Acquisition parameters for phytohormones analysis.

| Compound                          | RT<br>[min] | Polarity | Parent<br>Ion<br>[m/z] | Fragmentor<br>V | Collision Energy<br>V | Product<br>Ion<br>[m/z] |
|-----------------------------------|-------------|----------|------------------------|-----------------|-----------------------|-------------------------|
| <i>Trans</i> -zeatin              | 1.93        | +        | 220.1                  | 100             | 15                    | 136.1                   |
|                                   |             |          |                        |                 | 9                     | 202.1                   |
|                                   |             |          |                        |                 | 22                    | 148.1                   |
| <i>Trans</i> -zeatin-d5           | 1.92        | +        | 225.1                  | 105             | 16                    | 137.1                   |
|                                   |             |          |                        |                 | 10                    | 207.2                   |
| Absciscic acid (ABA)              | 4.68        | -        | 263.1                  | 85              | 4                     | 153.1                   |
|                                   |             |          |                        |                 | 5                     | 219.1                   |
|                                   |             |          |                        |                 | 12                    | 204.1                   |
| Absciscic acid-d6                 | 4.67        | -        | 269.1                  | 88              | 4                     | 159.1                   |
|                                   |             |          |                        |                 | 8                     | 225.1                   |
| Jasmonic acid (JA)                | 5.20        | +        | 211.2                  | 85              | 8                     | 133.1                   |
|                                   |             |          |                        |                 | 8                     | 151.1                   |
|                                   |             |          |                        |                 | 5                     | 193                     |
| Jasmonic acid-d5                  | 5.19        | +        | 216.1                  | 85              | 8                     | 135.1                   |
|                                   |             |          |                        |                 | 9                     | 153.2                   |
|                                   |             |          |                        |                 | 7                     | 198.2                   |
| Salicylic acid (SA)               | 4.05        | -        | 137                    | 140             | 15                    | 93.1                    |
|                                   |             |          |                        |                 | 35                    | 65.1                    |
| Salicylic acid glucoside (SA-Glu) | 2.41        | -        | 137                    | 140             | 15                    | 93.1                    |
|                                   |             |          |                        |                 | 35                    | 65.1                    |

**Table S4.** Statistical summary of GLM analysis with binomial distribution of the total mortality on in vitro experiments. Mortality includes mycosed larvae, pupae, and adults that developed mycosis after emerging.

| Isolate   | L3 Larvae |        |         |             |
|-----------|-----------|--------|---------|-------------|
|           | Estimate  | SEM    | z value | Pr(> z )    |
| Intercept | -1.6398   | 0.3706 | -4.425  | 9.65E-06*** |
| Cb15III   | 2.339     | 0.4349 | 5.378   | 7.52E-08*** |
| Cb17B     | 3.0474    | 0.4525 | 6.735   | 1.64E-11*** |
| CC5       | 3.1991    | 0.4588 | 6.972   | 3.11E-12*** |
| Gc1I      | 4.1194    | 0.5248 | 7.85    | 4.15E-15*** |
| Gd12      | 4.1194    | 0.5248 | 7.85    | 4.15E-15*** |
| Sand      | -0.7047   | 0.2525 | -2.791  | 0.00525**   |

**Table S5.** Statistical summary of GLM analysis with binomial distribution of the total mortality in planta experiment. Mortality includes mycosed larvae, pupae, and adults that developed mycosis after emerging. RCD: root collar diameter, included as covariant.

| Factor      | Estimate | Std. Error | z value | Pr(> z )  |
|-------------|----------|------------|---------|-----------|
| (Intercept) | 2.9015   | 0.9581     | 3.028   | 0.00246** |
| Cb15III     | -0.8301  | 0.3658     | -2.269  | 0.02324*  |
| Cb17B       | -0.2827  | 0.3721     | -0.76   | 0.44746   |
| CC5         | -0.4439  | 0.368      | -1.206  | 0.22774   |
| Gc1I        | -0.853   | 0.3887     | -2.195  | 0.02818*  |
| Gd12        | -1.0107  | 0.3561     | -2.839  | 0.00453** |
| RCD         | -0.1567  | 0.111      | -1.412  | 0.15794   |

**Table S6.** Statistical summary of beta regression analysis with of percentage of damage of root collar in planta experiment.

| Factor       | Estimate | Std. Error | z value | Pr(> z )     |
|--------------|----------|------------|---------|--------------|
| (Intercept)  | 1.1920   | 0.1789     | 6.662   | 2.71e-11 *** |
| TreatCb15III | -0.7290  | 0.2491     | -2.926  | 0.003432 **  |
| TreatCb17B   | -0.8382  | 0.2379     | -3.523  | 0.000427 *** |
| TreatCC5     | -0.6718  | 0.2394     | -2.807  | 0.005005 **  |
| TreatGc1I    | -0.8858  | 0.2623     | -3.377  | 0.000732 *** |
| TreatGd12    | -1.1614  | 0.2415     | -4.808  | 1.52e-06 *** |

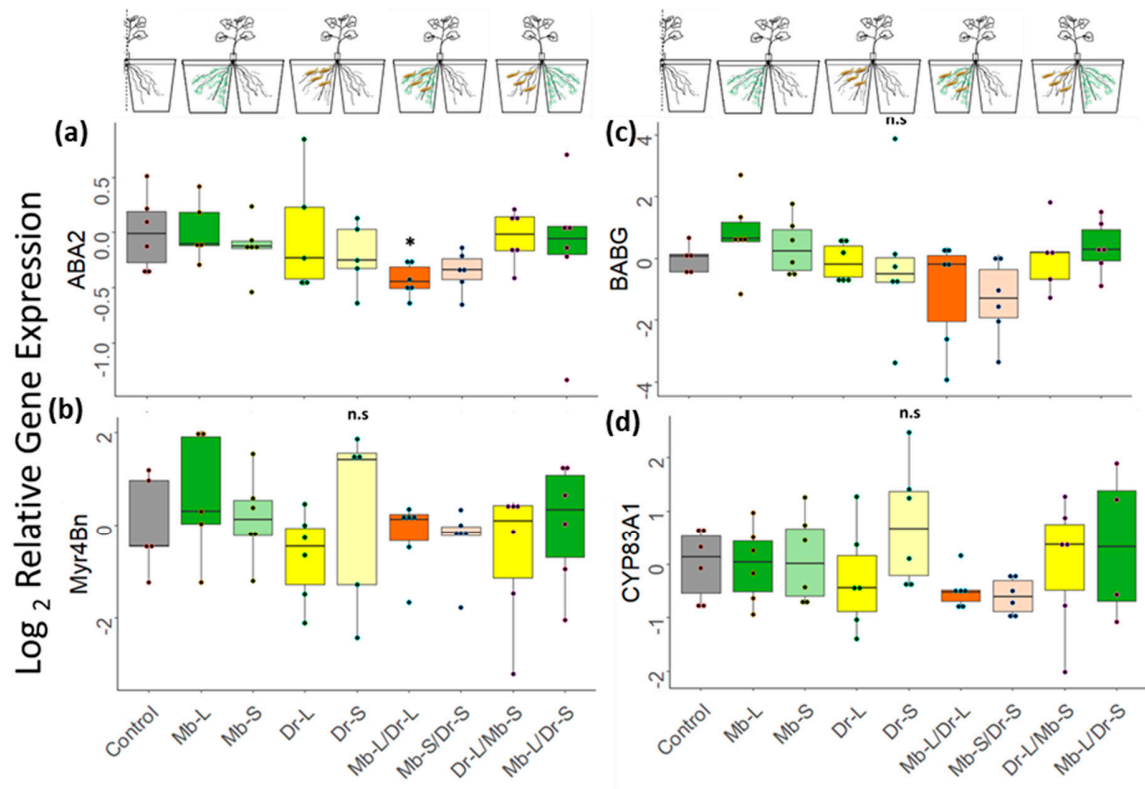

**Figure S1.** Normalized expression of representative genes of (a) abscisic acid biosynthesis *ABA2*, (b) myrosinase synthesis *Myr4Bn*, (c) beta-glucosidase biosynthesis *BABG* and (d) aliphatic GSL synthesis *CYP83A1*. Plants grew in a split root setup in which each compartment had either *M. brunneum* inoculation (Mb) in the local (L) or adjacent (S) compartment, *D. radicum* egg infestation (Dr) in the local (L) or adjacent (S) compartment, both treatments in same compartment (Mb-L/Dr-L), or each in adjacent compartments of the same plant (Dr-L/Mb-S; Mb-L/Dr-S). Eggs were placed 4 weeks after Mb inoculation. Plants were harvested 7 days after egg infestation. Gene expression was normalized to the housekeeping gene *AUXIN*. The boxplot shows all data points from at least 4 independent biological replicates ( $n \leq 6$ ) in which the horizontal line represents the median, surrounded by the upper (25th) and lower (75th) percentiles.
